# Supplementary material
Source: publisher figshare collection journal article supplement (https://acs.figshare.com/ndownloader/files/4601182)
Supplement: Supplementary file 1 [file 4601182]

# **SUPPORTING INFORMATION**

## **Mechanistic Characterization of the HDV Genomic Ribozyme: Solvent Isotope Effects and Proton Inventories in the Absence of Divalent Metal Ions Support C75 as the General Acid**

Andrea L. Cerrone-Szakal,<sup>1,2</sup> Nathan A. Siegfried,<sup>1</sup> and Philip C. Bevilacqua<sup>1,\*</sup>

<sup>1</sup>Department of Chemistry, The Pennsylvania State University, University Park, PA 16802

<sup>2</sup>Present Address: Center for Advanced Research in Biotechnology, University of Maryland Biotechnology Institute and the National Institute of Standards and Technology, 9600 Gudelsky Drive, Rockville, MD 20850, USA.

### **Contents:**

**S.1: Derivation of the Population-Weighted Gross-Butler Equation**

**S.2: Limits of the Population-Weighted Gross-Butler Equation**

## S.1: Derivation of the Population-Weighted Gross-Butler Equation

Equation 9 is a population-weighted form of the Gross-Butler equation, which was used in the main text to describe the proton inventories performed in the high-pL plateau of the rate-pL plots.

$$k_n/k_0 = (1-n)^2 + \phi_{C75}^T n(1-n)10^{\Delta pK_{C75}} + \phi_{OL-}^E n(1-n)10^{-\Delta pK_{LOL}} + \phi_{C75}^T \phi_{OL-}^E n^2 10^{\Delta pK_{C75} - \Delta pK_{LOL}} \quad (9)$$

Following is a derivation of this equation. We begin by noting that in H<sub>2</sub>O-D<sub>2</sub>O mixtures at high pL, ribozymes exist with general acid and specific base species in one of four isotopic combinations: HH, DH, HD, and DD, respectively. The reactivity of each isotopic combination can be described as a product of the intrinsic rate constant and the fractional population of the general acid and specific base.<sup>1</sup> The intrinsic rate constant at high pL is the product of  $k_{OH-}$  and the appropriate factor(s),  $\phi^T$  and  $\phi^E$  for C75D<sup>+</sup> and OD<sup>-</sup>, respectively.<sup>a</sup> The fractional populations of the general acid and specific base are given by the product of four factors: the fraction of general acid with H or D as appropriate and as determined from its equilibrium constant ( $f_{C75L+}$ ); the fraction of H<sub>2</sub>O or D<sub>2</sub>O, as appropriate and determined by factors of 1-n and n,<sup>b</sup> respectively; and two similar terms for the specific base. This leads to the following four-term expression for the observed rate constant, where the four terms on the right-hand side of the equation represent the general acid and specific base in the forms HH, DH, HD, and DD, respectively:

$$k_n^{obs} = k_{OH-}(1-n)^2 f_{C75H+} f_{OH-} + k_{OH-} \phi_{C75}^T n(1-n) f_{C75D+} f_{OH-} + k_{OH-} \phi_{OL-}^E n(1-n) f_{C75H+} f_{OD-} + k_{OH-} \phi_{C75}^T \phi_{OL-}^E n^2 f_{C75D+} f_{OD-} \quad (15)^c$$

<sup>a</sup> As described in the main text, the contribution of C75D<sup>+</sup> is most consistent with a transition state fractionation factor ( $\phi^T$ ), while the contribution of OD<sup>-</sup> is most consistent with an equilibrium isotope effect ( $\phi^E$ ).

<sup>b</sup> n is the mole fraction of D<sub>2</sub>O in solution.

<sup>c</sup> Numbering of equations picks up where it left off in the main text.

Note that the contributions of  $\phi^R$  (reactant state fractionation factors) are assumed to be unity, except for lyoxide, as is customary.<sup>2</sup> The fraction of the ribozyme having C75L<sup>+</sup> at high pL is approximated by  $f_{C75L^+} = \frac{1}{10^{pL-pK_{R,L}}}$ , while the fraction of lyoxide in solution is well approximated by  $f_{OL^-} = 10^{pL-pK_{LOL}} / 55M$ <sup>d</sup>

Substituting and factoring gives

$$k_n^{obs} = k_{OH^-} \left[ \frac{(1-n)^2 \frac{10^{pH-pK_{HOH}} / 55M}{10^{pH-pK_{R,H}}} + \phi_{C75}^T n(1-n) \frac{10^{pH-pK_{HOH}} / 55M}{10^{pD-pK_{R,D}}} \right. \\ \left. + \phi_{OL^-}^E n(1-n) \frac{10^{pD-pK_{DOD}} / 55M}{10^{pH-pK_{R,H}}} + \phi_{C75}^T \phi_{OL^-}^E n^2 \frac{10^{pD-pK_{DOD}} / 55M}{10^{pD-pK_{R,D}}} \right] \quad (16)$$

The rate constant in pure HOH, which will be used as the reference rate constant, can be obtained by substituting n=0 into eq 16.

$$k_0^{obs} = k_{OH^-} 10^{pK_{R,H}-pK_{HOH}} / 55M \quad (17)$$

Dividing eq 16 by eq 17 gives eq 9 in the main text:<sup>e</sup>

$$k_n^{obs} / k_0^{obs} = (1-n)^2 + \phi_{C75}^T n(1-n) 10^{\Delta pK_{C75}} + \phi_{OL^-}^E n(1-n) 10^{-\Delta pK_{LOL}} + \phi_{C75}^T \phi_{OL^-}^E n^2 10^{\Delta pK_{C75}-\Delta pK_{LOL}} \quad (9)$$

The  $\Delta pK$  terms in the exponents of the last three terms on the right-hand side of the equation are for ionization of C75 or autoprotolysis of solvent, and each is equal to the value in DOD minus the value in HOH. Specifically,  $\Delta pK_{C75}$  is 0.44 (=7.92-7.48) (see Results), while  $\Delta pK_{LOL}$  is 0.85 (=14.23-13.38).

We note that it is possible to subdivide eq 9 further by taking into consideration the origin of OH<sup>-</sup> in HOH or DOH, and the origin of OD<sup>-</sup> in HOD or DOD. To a first approximation, the autoprotolysis constant for DOH is intermediate between the constants for DOD and HOH.<sup>3</sup> Simulation of this eight term equation under the four limiting conditions shown in Figures 5B

<sup>d</sup> Here we are taking the fraction of LOL in the OL<sup>-</sup> form.

<sup>e</sup> The experiment was conducted by mixing pH 9 and pD 9 buffers, so that pH and pD cancel to a first approximation.

and 5C gave behavior that is similar (not shown) to the simpler four-term eq 9. As such, eq 9 was used in all fitting and simulation.

## S.2: Limits of the Population-Weighted Gross-Butler Equation

We consider three limits of eq 9:

Limit 1: If the acid and base species are fully functional, as ‘expected’ in the plateau region, (*i.e.*  $f_{C75L+} = f_{OL-} = 1$ ) and two protons are transferred, then the base 10 exponential terms in eq 9 go to unity and eq 9 reduces to:

$$k_n^{obs} / k_0^{obs} = (1 - n)^2 + \phi_{C75}^T n(1 - n) + \phi_{OL-}^E n(1 - n) + \phi_{C75}^T \phi_{OL-}^E n^2 \quad (18)$$

This equation can be factored to give

$$k_n^{obs} / k_0^{obs} = (1 - n + n\phi_{OL-}^E)(1 - n + n\phi_{C75}^T) \quad (19)$$

which, as expected, is the Gross-Butler equation for two non-equivalent proton transfers (eq 7).

Limit 2: If the acid and base species are fully functional *and* only one proton is transferred (*e.g.*

$\phi_{OL-}^E = 1$ ), then eq 18 reduces to:

$k_n^{obs} / k_0^{obs} = (1 - n)^2 + \phi_{C75}^T n(1 - n) + n(1 - n) + \phi_{C75}^T n^2$ , which can be simplified to give

$$k_n^{obs} / k_0^{obs} = 1 - n + n\phi_{C75}^T \quad (20)$$

As expected, this is the Gross-Butler equation for one proton transfer (eq 8, m=1).

Limit 3: If there is no intrinsic isotope effect (*i.e.*  $\phi_{C75}^T = \phi_{OL-}^E = 1$ ), but  $f_{C75L+}$  and  $f_{OL-}$  are less than unity then eq 9 reduces to:

$$k_n^{obs} / k_0^{obs} = (1 - n)^2 + n(1 - n)10^{\Delta pK_{C75}} + n(1 - n)10^{-\Delta pK_{LOL}} + n^2 10^{\Delta pK_{C75} - \Delta pK_{LOL}} \quad (21)$$

This equation is used in some of the simulations to see if populations changes-only describe the proton inventories.

## References

1. Bevilacqua, P. C. *Biochemistry* **2003**, 42, 2259-2265.
2. Quinn, D. M.; Sutton, L. D., Theoretical Basis and Mechanistic Utility of Solvent Isotope Effects. In *Enzyme Mechanism from Isotope Effects*, Cook, P. F., Ed. CRC Press, Inc.: Boca Raton, FL, 1991; pp 73-126.
3. Schowen, K. B.; Schowen, R. L. *Methods Enzymol.* **1982**, 87, 551-606.
